# CORRECTION

## Correction: Formation of homophily in academic performance: Students change their friends rather than performance

The *PLOS ONE* Staff

### Notice of Republication

This article was republished on November 15, 2017, to correct an error in the S1 Text file that was introduced during the typesetting process. The publisher apologizes for the error. Please download this article again to view the correct version.

### Reference

1. Smirnov I, Thurner S (2017) Formation of homophily in academic performance: Students change their friends rather than performance. PLoS ONE 12(8): e0183473. <https://doi.org/10.1371/journal.pone.0183473> PMID: [28854202](https://pubmed.ncbi.nlm.nih.gov/28854202/)

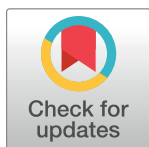

### OPEN ACCESS

**Citation:** The *PLOS ONE* Staff (2017) Correction: Formation of homophily in academic performance: Students change their friends rather than performance. PLoS ONE 12(12): e0189564. <https://doi.org/10.1371/journal.pone.0189564>

**Published:** December 7, 2017

**Copyright:** © 2017 The PLOS ONE Staff. This is an open access article distributed under the terms of the [Creative Commons Attribution License](https://creativecommons.org/licenses/by/4.0/), which permits unrestricted use, distribution, and reproduction in any medium, provided the original author and source are credited.
